# Supplementary material for: Empirical evidence on the efficiency of bidirectional contact tracing in COVID-19
Source: Research Square preprint supplement (doi:10.21203/rs.3.rs-952839/v1), 2021-10-04
Supplement: Supplementary file 1 [file 691f46c5993d7a087f46fb5c.docx]

Extended data


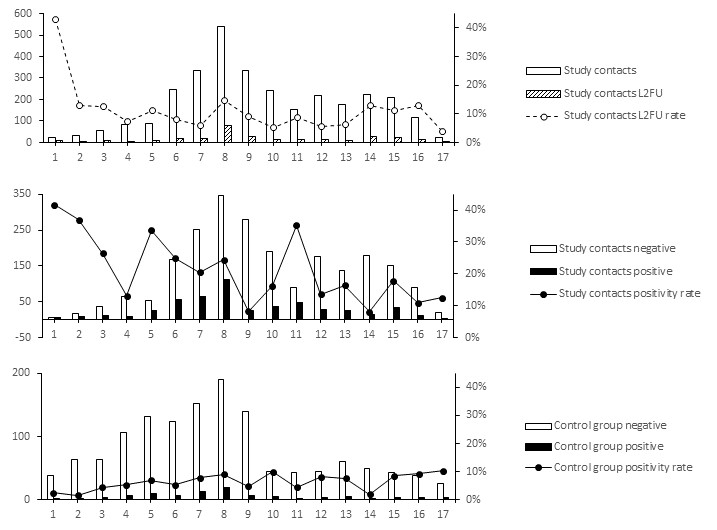


*Extended data Fig. 1. Evolution of the lost to follow-up rate and positivity rates over the course of the study period. a) Proportion of contacts lost to follow-up. b) Risk of infection for close contacts. c) Risk of infection in the symptomatic control group.*


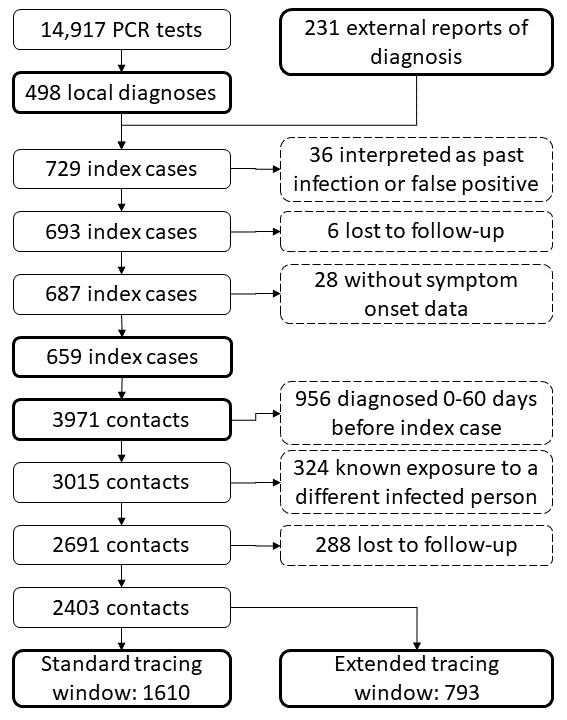


*Extended data Fig. 2. Exclusion flow chart for the number of cases and contacts included and excluded.*
